# Supplementary material
Source: Springer Nature journal article supplement (https://www.springermedizin.de/resource/supplementary/12936_2012_2586_MOESM3_ESM.pdf/9543330)

**Number of patients with gametocytemia**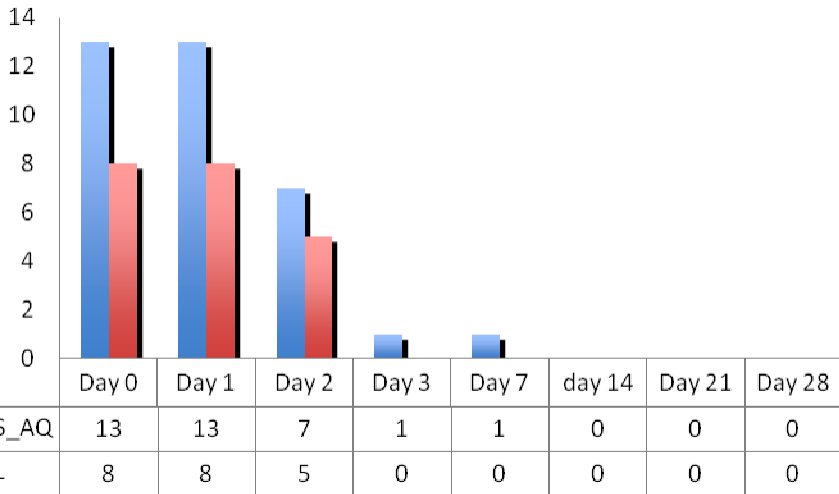

Supplement: MOESM3 [file 9543330]
